# Supplementary material for: Mesenchymal Stem Cell-Derived Extracellular Vesicles Protect Human Corneal Endothelial Cells from Endoplasmic Reticulum Stress-Mediated Apoptosis
Source: MDPI journal article supplement (doi:10.3390/ijms22094930), 2021-05-06
Supplement: s1 [file s1]

# Mesenchymal Stem Cell-Derived Extracellular Vesicles Protect Human Corneal Endothelial Cells from Endoplasmic Reticulum Stress-Mediated Apoptosis

Lola Buono, Simona Scalabrin, Marco De Iuliis, Adele Tanzi, Cristina Grange, Marta Tapparo, Raffaele Nuzzi and Benedetta Bussolati

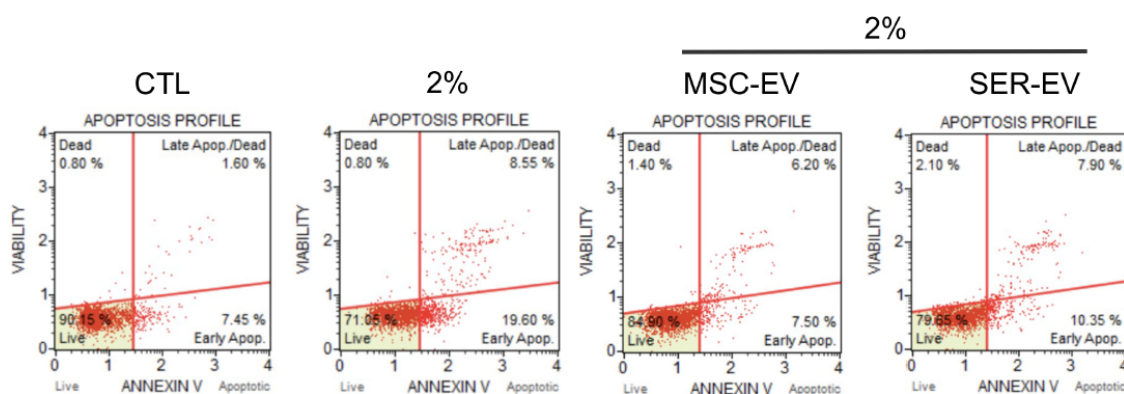

**Figure S1.** Representative dot plots showing viability (Dead Cell Marker 7-AAD) vs. apoptosis (Annexin V) of stained HCECs. Cells were untreated (CTL) or under serum deprivation (2%) with or without MSC-EVs or SER-EVs ( $20 \times 10^3$ /target cell). The percentages of each population are reported: lower-left quadrant: viable cells; lower- right quadrant: cells in the early stages of apoptosis; upper-right quadrant: cells in the late stages of apoptosis or dead; upper-left quadrant: cells that have died not through the apoptotic pathway.

**Table S1.** Clinical and biological information of patients undergoing penetrating keratoplasty. Clinical and biological aspects of patients from which we received corneal buttons. FECD: Fuchs' Endothelial Corneal Dystrophy; PKP: Penetrating Keratoplasty.

| Sex | Age | Diagnosis                               | Surgical Procedure | Ophtalmological Therapy                                                   |
|-----|-----|-----------------------------------------|--------------------|---------------------------------------------------------------------------|
| F   | 75  | Ocular hypertonia of traumatic etiology | Enucleation        | Topical therapy: timolol, diclofenac                                      |
| F   | 35  | Keratoconus                             | PKP                | Topical therapy: hydrocortisone                                           |
| F   | 66  | FECD                                    | PKP                | Topical therapy: loteprednol                                              |
| F   | 47  | Corneal leukoma                         | PKP                |                                                                           |
| M   | 75  | Corneal leukoma                         | PKP                | Systemic therapy: acetazolamide<br>Topical therapy: brinzolamide, timolol |
| M   | 78  | Corneal leukoma                         | PKP                |                                                                           |
| F   | 83  | FECD                                    | PKP                | Topical therapy: indomethacin, bromfenac, edenorm                         |
| F   | 47  | FECD                                    | PKP                |                                                                           |
| M   | 81  | FECD                                    | PKP                | Topical therapy: netilmicin, dexamethasone, ofloxacin                     |
| M   | 40  | Keratoconus                             | PKP                |                                                                           |
| F   | 40  | Pellucid marginal degeneration          | PKP                |                                                                           |
| F   | 77  | FECD                                    | PKP                | Topical therapy: brinzolamide, timolol, brimonidine                       |
| M   | 80  | FECD                                    | PKP                | Topical therapy: chloramphenicol dexamethasone, bluyal a                  |
| F   | 70  | Corneal leukoma                         | PKP                |                                                                           |
| F   | 72  | Corneal leukoma                         | PKP                | Topical therapy: trehalose, clobetasone                                   |
| F   | 31  | Keratoconus                             | PKP                |                                                                           |
| M   | 71  | FECD                                    | PKP                |                                                                           |

|   |    |                                  |     |
|---|----|----------------------------------|-----|
| M | 67 | FECD                             | PKP |
| F | 24 | Corneal leukoma                  | PKP |
| M | 75 | Transplanted cornea late failure | PKP |
| M | 78 | Transplanted cornea late failure | PKP |
| F | 21 | Corneal leukoma (chemical burn)  | PKP |
| F | 66 | Corneal leukoma                  | PKP |

**Table S2.** Primer sequence list for mRNAs and miRNAs tested in the study. 1–5, primers for mRNA detection, 6–11 primers for miRNA detection.

|     | Symbol          | Forward                  | Reverse                |
|-----|-----------------|--------------------------|------------------------|
| 1.  | GAPDH           | TGGAAGGACTCATGACCACAGT   | CATCACGCCACAGTTTCCC    |
| 2.  | ATF4            | TTCTCCAGCGACAAGGCTAAGG   | CTCCAACATCCAATCTGTCCCG |
| 3.  | GRP78           | CTGGCAAGATGAAGCTC        | GGAGTGAAGGCGACATAGGA   |
| 4.  | XBP1            | GGTCTGCTGAGTCCGCAGCAGG   | AGTTCATTAATGGCTTCCAGCT |
| 5.  | CHOP            | TCTGGTCTTGTGGGGTATGC     | AAAGCTGAGTTGGCCAGGAC   |
| 6.  | RNU6B           | CGCAAGGATGACACGCAA       |                        |
| 7.  | hsa-miR-222-3p  | AGCTACATCTGGCTACTGGGT    |                        |
| 8.  | hsa-miR-125b-5p | TCCCTGAGACCCTAACTTGTG    |                        |
| 9.  | hsa-miR-21-5p   | TAGCTTATCAGACTGATGTTG    |                        |
| 10. | hsa-miR-214-3p  | ACAGCAGGCACAGACAGG       |                        |
| 11. | hsa-miR-199a-3p | CCCAGTGTTTCAGACTACCTGTTC |                        |
